# Supplementary material
Source: PubMed Central journal article supplement (PMC8748383)
Supplement: NIHMS1755015-supplement-1.pdf [file NIHMS1755015-supplement-1.pdf]

Supplementary Table 1: Neighborhood Food Environment Characteristics

|                                                | Exam 1 |            | Exam 5 |            |
|------------------------------------------------|--------|------------|--------|------------|
|                                                | Mean   | Range      | Mean   | Range      |
| Distance to favorable food stores (Continuous) | -0.04  | 0.6, 6.8   | 0.10   | -0.9, 31.0 |
| Tertile 1                                      | -0.66  | -0.9, -0.5 | -0.66  | -0.9, -0.5 |
| Tertile 2                                      | -0.21  | -0.5, 0.1  | -0.22  | -0.5, 0.1  |
| Tertile 3                                      | 0.76   | 0.1, 7.4   | 1.03   | 0.1, 31.0  |
| Density of supermarkets (Continuous)           | -0.02  | -0.9, 7.4  | -0.06  | -0.6, 5.5  |
| Tertile 1                                      | -0.60  | -0.6, -0.5 | -0.61  | -0.6, -0.5 |
| Tertile 2                                      | -0.41  | -0.5, -0.2 | -0.40  | -0.5, -0.2 |
| Tertile 3                                      | 1.02   | -0.2, 6.8  | 0.91   | -0.2, 5.5  |
| Healthy Food Environment (Continuous)          | -0.29  | -3.0, 2.0  | 0.31   | -1.9, 2.1  |
| Tertile 1                                      | -1.27  | -3.3, -0.4 | -0.84  | -1.9, -0.4 |
| Tertile 2                                      | 0.05   | -0.4, 0.4  | 0.10   | -0.4, 0.5  |
| Tertile 3                                      | 1.15   | 0.5, 2.0   | 1.01   | 0.5, 2.1   |
| Healthy Food Environment (Continuous)          | -0.18  | -3.0, 5.0  | 0.19   | -1.6, 4.0  |
| Tertile 1                                      | -1.13  | -2.5, -0.5 | -0.82  | -1.6, -0.5 |
| Tertile 2                                      | -0.09  | -0.5, 0.3  | -0.07  | -0.5, 0.3  |
| Tertile 3                                      | 1.23   | 0.3, 5.2   | 1.01   | 0.3, 4.0   |

Local food environment standardized scores are displayed
